# Supplementary material
Source: MDPI journal article supplement (https://www.mdpi.com/1424-8247/15/7/817)
Supplement: s1 [file s1]

# **Adverse Drug Reactions in Relation to Clozapine Plasma Levels: A Systematic Review**

**Maria Skokou <sup>1,†</sup>, Eleni A. Karavia <sup>2,†</sup>, Zoi Drakou <sup>1,2,†</sup>, Vassiliki Konstantinopoulou <sup>2,†</sup>, Christina-Anna Kavakioti <sup>1</sup>, Philippos Gourzis <sup>1</sup>, Kyriakos E. Kypreos <sup>2,3</sup> and Ourania Andreopoulou <sup>1,\*</sup>**

<sup>1</sup> Department of Psychiatry, General University Hospital of Patras, School of Medicine, University of Patras, Patras 26504, Greece; mskokou@upatras.gr (M.S.); zoidrakou@gmail.com (Z.D.); christiana-kav@hotmail.com (C.-A.K.); pgourzis@upatras.gr (P.G.)

<sup>2</sup> Department of Pharmacology, School of Medicine, University of Patras, Patras 26504, Greece; karaviae@hotmail.com (E.A.K.); venia45@yahoo.gr (V.K.); kkypreos@upatras.gr (K.E.K.)

<sup>3</sup> Department of Life Sciences, School of Sciences, European University of Cyprus, Nicosia 2404, Cyprus

\* Correspondence: andreop@upatras.gr

† These authors contributed equally to this work.

## Supplemental Data

**Table S1A.** Case Reports referring to adverse effects of clozapine in relation to drug levels.

| Reference | Location       | Patients             | Age    | Race         | Diagnosis                      | Comedication                                              | Serum levels of clozapine (ng/ml)  | Duration of treatment                 | Reported Side effects                                                                                                                                                                |
|-----------|----------------|----------------------|--------|--------------|--------------------------------|-----------------------------------------------------------|------------------------------------|---------------------------------------|--------------------------------------------------------------------------------------------------------------------------------------------------------------------------------------|
| [102]     | USA            | 2, females           | 24/47  | Not reported | schizophrenia                  | None                                                      | Case 1: 1313<br>Case 2: 2194, 2064 | Case 1: 27 months<br>Case 2: 15 weeks | Grand mal convulsions after accidental ingestion of clozapine overdose                                                                                                               |
| [103]     | USA            | 1 female, 38, 1 male | 38, 40 | Caucasian    | Schizophrenia/ not specified   | olanzapine and paroxetine/not reported                    | Case 1: 2898<br>Case 2: 1500       | Not reported                          | Drowsiness, minimal responsiveness, partial complex seizures with corresponding spike discharges on the EEG /CNS toxicity (sedation, weakness, dizziness, slurred speech, confusion) |
| [104]     | USA            | 1 female             | 22     | White        | Schizophrenia                  | Haloperidol, olanzapine                                   |                                    | 58 days                               | Myoclonus resulting in unexpected falls and dropping things                                                                                                                          |
| [105]     | Germany        | 1 male               | 30     | Not reported | Schizophrenia                  | clomipramine                                              | 260                                | 3 years                               | Obsessive Compulsive symptoms                                                                                                                                                        |
| [106]     | Italy          | 1 female             | 29     | Caucasian    | Schizoaffective                | Oral contraceptives                                       | 542                                | 3 weeks                               | pericardial effusion and echocardiographic abnormalities (possible hypersensitivity reaction with eosinophilia, nausea, vomiting and palpitations)                                   |
| [107]     | Italy          | 1 male               | 27     | Not reported | schizophrenia                  | lorazepam                                                 | 425                                | 12 days                               | Myocarditis presenting with fever, pharyngodynia, malaise, dyspnea. Also there were reported leukocytosis and slight cardiac enlargement on the chest X-ray.                         |
| [108]     | United Kingdom | Male                 | 41     | Not reported | Paranoid schizophrenia         | Lactulose, amitriptyline, sertraline, movicol when needed | Ante-mortem:560, post-mortem:3730  | 4 years                               | Constipation, aspiration of gastric contents and intestinal dilatation leading to death                                                                                              |
| [109]     | USA            | Female               | 61     | Not reported | Chronic paranoid schizophrenia | Trazodone, fluoxetine, docusate sodium,                   | 553                                | 18 years                              | Paralytic ileus (nausea, vomiting, abdominal pain, distension)                                                                                                                       |

|       |             |        |    |                 |                                                  |                                               |                         |           |                                                                                                                                            |
|-------|-------------|--------|----|-----------------|--------------------------------------------------|-----------------------------------------------|-------------------------|-----------|--------------------------------------------------------------------------------------------------------------------------------------------|
|       |             |        |    |                 |                                                  | polyethylene glycol,<br>bisacodyl suppository |                         |           |                                                                                                                                            |
| [110] | Italy       | Male   | 45 | Italian         | Treatment-resistant<br>residual<br>schizophrenia | Lorazepam, sertraline                         | 490                     | 5 months  | Intestinal occlusion (constipation, abdominal<br>distention, biliary vomiting)                                                             |
| [111] | Netherlands | Male   | 44 | Not<br>reported | Schizophrenia                                    | Lithium, omeprazole                           | 1301                    | >10 years | Paralytic ileus (abdominal pain, nausea,<br>vomiting, diarrhea)                                                                            |
| [112] | Netherlands | Male   | 46 | Not<br>reported | Chronic<br>schizophrenia                         | Oxazepam, lansoprazole                        | 2400                    | 7 years   | Extreme vomiting                                                                                                                           |
|       | Netherlands | Male   | 37 | Not<br>reported | Chronic<br>schizophrenia                         | Not mentioned                                 | 1056                    | 4 years   | Stomachache, diarrhea, incontinence                                                                                                        |
| [113] | UK          | Female | 31 | Caucasian       | Schizoaffective<br>disorder                      | Sodium valproate                              | CLOZ: 330<br>NCLOZ: 200 | 71 days   | Neutropenia (reversed with lithium)                                                                                                        |
| [90]  | Germany     | Female | 70 | Not<br>reported | Delusional<br>depression                         | Not reported                                  | CLOZ: 285               | 6-8 weeks | Leukocytopenia.<br>CLOZ leukocyte levels (12.8) were 6-8 times<br>higher than the mean of 10 controls with no<br>history of leukocytopenia |

**Table S1B.** Additional data from all included studies (cited in the main manuscript).

| Reference | Mode of titration                                                                                                                                                                                                                                                                                               | Correlation of CLOZ dose with levels                                                                                            | Correlation of CLOZ dose with side effects                                          | Use of specific scales/tools for the assessment of side effects                                                                                                                                                    |
|-----------|-----------------------------------------------------------------------------------------------------------------------------------------------------------------------------------------------------------------------------------------------------------------------------------------------------------------|---------------------------------------------------------------------------------------------------------------------------------|-------------------------------------------------------------------------------------|--------------------------------------------------------------------------------------------------------------------------------------------------------------------------------------------------------------------|
| [34]      | Titration by 25-50 mg increments every day or every other day up to assigned drug level                                                                                                                                                                                                                         | CLOZ dose and level significantly correlated ( $r=0.64$ , $p<0.001$ ). Dose correlated with EEG slowing ( $r=0.36$ , $p=0.02$ ) | Positive correlation with EEG slowing, but weaker than correlation with CLOZ levels | EEG recordings, Ordinal scale for sleepiness                                                                                                                                                                       |
| [58]      | Not precisely specified. Patients were switched from previous antipsychotic to CLOZ by stopping the first on the morning of one day and initiating CLOZ on the next. Mean final dose was $319.8\pm183.0$ mg/day, reached at $20.2\pm16.8$ days, minus 1 week, during which CLOZ dosage should have been stable. | Not reported                                                                                                                    | No correlation                                                                      | EEG recordings                                                                                                                                                                                                     |
| [35]      | Stable CLOZ dosage                                                                                                                                                                                                                                                                                              | Positive correlation between CLOZ dosage and CLOZ plasma levels ( $r=0.7$ , $p<0.001$ )                                         | No correlation                                                                      | UKU side effects rating scale<br>ECG and EEG recordings<br>Pulse and systolic and diastolic BP measures                                                                                                            |
| [39]      | Titration over 12 weeks, increasing by 25-50mg every 1-2 days until reaching assigned range of serum levels                                                                                                                                                                                                     | Positive correlation between CLOZ dosage and CLOZ levels ( $r=0.58$ , $p<0.001$ )                                               | Not reported                                                                        | Extrapyramidal symptoms recorded on an anchored scale of seven items.<br>AIMS for the assessment of dyskinesias<br>Orthostatic hypotension, tachycardia, sleepiness, assessed on an ordinal scale (not validated). |
| [40]      | Starting at 12.5 or 25 mg and increasing by no more than 25 mg every other day, over 6 weeks, with final dose: 75mg-800mg                                                                                                                                                                                       | No correlation between CLOZ dosage and CLOZ levels; positive correlation between CLOZ dosage and NCLOZ levels.                  | Not reported                                                                        | No use of relevant scales; adverse effects rated by clinician as present vs absent                                                                                                                                 |
| [41]      | Stable CLOZ dosage                                                                                                                                                                                                                                                                                              | Close positive correlation between CLOZ dose (mg per kg) and CLOZ ( $r=0.60$ ), NCLOZ ( $0.70$ ), NOX ( $0.69$ ) and total      | No correlation                                                                      | Systemic Assessment For Treatment-Emergent Events (SAFTEE),<br>AIMS, Barnes akathisia scale, Simpson-Angus extrapyramidal symptom scale                                                                            |

|      |                                                                                                                                                                                                                                                                                                                                                  |                                                                                                                                      |                                                                                                                                                                                                                                   |                                                                                                                                                                                                                                                                              |
|------|--------------------------------------------------------------------------------------------------------------------------------------------------------------------------------------------------------------------------------------------------------------------------------------------------------------------------------------------------|--------------------------------------------------------------------------------------------------------------------------------------|-----------------------------------------------------------------------------------------------------------------------------------------------------------------------------------------------------------------------------------|------------------------------------------------------------------------------------------------------------------------------------------------------------------------------------------------------------------------------------------------------------------------------|
|      |                                                                                                                                                                                                                                                                                                                                                  | metabolite and CLOZ levels<br>( $r=0.69$ ), ( $p\leq 0.001$ )                                                                        |                                                                                                                                                                                                                                   |                                                                                                                                                                                                                                                                              |
| [42] | Titration over 3-4 weeks, reaching 300mg CLOZ daily. Further increase over another 4-5 weeks, reaching 500 mg CLOZ, in a subsample                                                                                                                                                                                                               | Subjects on CLOZ dosage=300 mg/day had significantly lower plasma levels of CLOZ ( $p=0.01$ ) and NCLOZ ( $p=0.02$ )                 | Not reported                                                                                                                                                                                                                      | Laboratory, EEG and ECG measurements. Udvalg for Kliniske Undersogelser (UKU) Rating Scale                                                                                                                                                                                   |
| [75] | Stable CLOZ dosage                                                                                                                                                                                                                                                                                                                               | Not reported                                                                                                                         | Not reported                                                                                                                                                                                                                      | Liverpool University Neuroleptic Side Effect Rating Scale (LUNSERS)                                                                                                                                                                                                          |
| [68] | Stable CLOZ dosage                                                                                                                                                                                                                                                                                                                               | Not reported                                                                                                                         | Not reported                                                                                                                                                                                                                      | Ray learning test, WAIS-III Digits test, , Card sorting test, , Phonetic Verbal Fluency Test                                                                                                                                                                                 |
| [43] | Not described                                                                                                                                                                                                                                                                                                                                    | CLOZ dose (mg/kg) correlated with CLOZ ( $r=0.79$ , $p=0.02$ ) NCLOZ( $r=0.82$ , $p=0.01$ ), and NOX ( $r=0.91$ , $p=0.004$ ) levels | Positive correlation with absolute and percent change in weight ( $r=0.7$ , $p=0.03$ ; $r=0.9$ , $p=0.005$ )                                                                                                                      | AIMS, Simpson-Angus EPS Scale, Subjective Treatment Emergent Symptoms Scale, Liver function tests, blood cell counts, EEG, ECG                                                                                                                                               |
| [59] | Stable CLOZ dosage                                                                                                                                                                                                                                                                                                                               | Not reported                                                                                                                         | No correlation                                                                                                                                                                                                                    | CPS (Cognitive Performance Scale)                                                                                                                                                                                                                                            |
| [62] | Titration over 16 weeks, starting at 25 mg on the first day, 50 mg on second and third days, 75 mg on the fourth and fifth days and 100 mg on each of the sixth and seventh days. Then titration upward by 100 mg per week for the first 3 weeks and thereafter by 200 mg per week until the assigned double-blind dose of 100mg, 300mg or 600mg | Not reported                                                                                                                         | Positive correlation at the end of the first 16-week trial ( $r=0.48$ , $p=0.04$ ), explaining only 25% of the variance of serum antimuscarinic activity<br>Moderate positive correlation within-subject ( $r=0.69$ , $p<0.001$ ) | Checklist of clozapine side effects rated as present vs absent, focusing on those mainly related to antimuscarinic activity: constipation, hypersalivation, drowsiness/sedation, urinary disturbances. Measuring of serum antimuscarinic activity by the [ $^3$ H]QNB assay. |
| [60] | Stable CLOZ dosage                                                                                                                                                                                                                                                                                                                               | Not reported                                                                                                                         | No correlation                                                                                                                                                                                                                    | Y-BOCS, NIMH-G-OCS                                                                                                                                                                                                                                                           |
| [47] | Stable CLOZ dosage                                                                                                                                                                                                                                                                                                                               | Not reported                                                                                                                         | No correlation                                                                                                                                                                                                                    | EEG recordings                                                                                                                                                                                                                                                               |
| [44] | Not described                                                                                                                                                                                                                                                                                                                                    | Positive correlation between CLOZ dose and plasma levels ( $p<0.01$ )                                                                | Not reported                                                                                                                                                                                                                      | Blood pressure, pulse and temperature measurements                                                                                                                                                                                                                           |
| [64] | Initiating at 25-50 mg daily, increasing by 25mg 3 times a week, depending on efficacy and tolerance, until final dose of $468.3\pm 179.3$ over 8 weeks                                                                                                                                                                                          | Not reported                                                                                                                         | Inverse correlation with temperature between week 2 and week 7 of the study ( $r=-0.24$ , $p<0.01$ )                                                                                                                              | Measurements of vital signs                                                                                                                                                                                                                                                  |

|      |                                                                                                                                                                                                                                                                                                                         |                                                  |                                                                |                                                                                                                         |
|------|-------------------------------------------------------------------------------------------------------------------------------------------------------------------------------------------------------------------------------------------------------------------------------------------------------------------------|--------------------------------------------------|----------------------------------------------------------------|-------------------------------------------------------------------------------------------------------------------------|
| [80] | CLOZ dosage not reported; possibly rapid titration, reaching CLOZ levels of 297±152 over 14±7 days, in patients who developed myocarditis at this time point                                                                                                                                                            | Not reported                                     | Not reported                                                   | Echocardiography and relevant blood laboratory measures                                                                 |
| [79] | Not reported; Measurements conducted at week 18 after initiation of CLOZ, at dosage 284.15±131.44                                                                                                                                                                                                                       | Not reported                                     | Not reported                                                   | ECG recordings                                                                                                          |
| [76] | Starting at 25 mg/day and increasing by 25mg/day once a week, over a period of 4 weeks, to final dose of 100 mg/day                                                                                                                                                                                                     | Not applicable (all received the same CLOZ dose) | Not applicable                                                 | M-mode echocardiography measures and relevant blood laboratory measures                                                 |
| [72] | Stable CLOZ dosage for at least 8 weeks                                                                                                                                                                                                                                                                                 | Not reported                                     | Not reported                                                   | HRV measures based on ECG recordings                                                                                    |
| [73] | Stable CLOZ dosage for at least a week                                                                                                                                                                                                                                                                                  | Not reported                                     | Not reported                                                   | HRV measures based on ECG recordings                                                                                    |
| [48] | Stable dosage                                                                                                                                                                                                                                                                                                           | Not reported                                     | No correlation                                                 | Tachycardia recorded by 24- hour Holter ECG                                                                             |
| [63] | Starting at 25 mg on the first day, 50 mg on second and third days, 75 mg on the fourth and fifth days and 100 mg on each of the sixth and seventh days. Then titration upward by 100 mg per week for the first 3 weeks and thereafter by 200 mg per week until the assigned double-blind dose of 100mg, 300mg or 600mg | Not reported                                     | Positive correlation (p=0.048)                                 | Weight measures                                                                                                         |
| [81] | Stable dosage                                                                                                                                                                                                                                                                                                           | Not reported                                     | Not reported                                                   | CHOL, TG, HDL, LDL measurements                                                                                         |
| [65] | Patients on stable dose of clozapine for at least 2 months                                                                                                                                                                                                                                                              | Not reported                                     | Negative correlation with AST plasma levels (r=-0.56, p=0.002) | Laboratory test measurements                                                                                            |
| [70] | Stable dosage                                                                                                                                                                                                                                                                                                           | Not reported                                     | Not reported                                                   | Lab measurements of insulin, IGF, IGFBP-1, blood glucose, triglycerides, cholesterol, HDL, LDL, leptin, IGF-I, IGFBP-1. |
| [49] | Stable dosage                                                                                                                                                                                                                                                                                                           | Not reported                                     | No correlation between dose and insulin levels                 | Glucose, insulin, IGF-I, IGFBP-1                                                                                        |
| [50] | Titration starting at 12.5 or 25 mg/d, escalating over 14 -21 days, depending on tolerance and response.                                                                                                                                                                                                                | Not reported                                     | No correlation                                                 | Weight measurement                                                                                                      |
| [51] | Stable dosage                                                                                                                                                                                                                                                                                                           | Not reported                                     | No correlation with BMI                                        | Measurements of BMI, lipid and fasting glucose blood levels. Evaluation of metabolic syndrome                           |

|      |                                                                                                                                                                                                                                                                                                                         |                                                                                             |                                                                                                                  |                                                                                                                                                      |
|------|-------------------------------------------------------------------------------------------------------------------------------------------------------------------------------------------------------------------------------------------------------------------------------------------------------------------------|---------------------------------------------------------------------------------------------|------------------------------------------------------------------------------------------------------------------|------------------------------------------------------------------------------------------------------------------------------------------------------|
| [74] | Stable dosage                                                                                                                                                                                                                                                                                                           | Not reported                                                                                | Not reported                                                                                                     | Measurement of weight, height, and blood tests for fasting glucose and lipid levels                                                                  |
| [70] | Stable dosage                                                                                                                                                                                                                                                                                                           | No correlation between CLOZ dose and CLOZ level                                             | Not reported                                                                                                     | Measurement of blood glucose lipid, insulin and C-peptide levels, calculation of HOMA-IR (Homeostasis Model Assessment Index for Insulin Resistance) |
| [71] | Titration in accordance with clinical efficacy and adverse effects, but not specifically described                                                                                                                                                                                                                      | Not reported                                                                                | Not reported                                                                                                     | UKU, Side Effect Rating Scale, ECG, urinalysis, physical and neurologic examination, hematologic and biochemical blood tests                         |
| [77] | Stable dosage                                                                                                                                                                                                                                                                                                           | Not reported                                                                                | Not reported                                                                                                     | Laboratory blood measurements                                                                                                                        |
| [66] | Starting at 25 mg on the first day, 50 mg on second and third days, 75 mg on the fourth and fifth days and 100 mg on each of the sixth and seventh days. Then titration upward by 100 mg per week for the first 3 weeks and thereafter by 200 mg per week until the assigned double-blind dose of 100mg, 300mg or 600mg | Not reported                                                                                | Positive correlation between doses and prolactin levels in females only, but weaker than correlation with levels | Lab measurements of prolactin plasma levels                                                                                                          |
| [46] | Initiation at 25 mg/d, increased by 25-50 mg every few days up to a median dosage of 300mg/d, over 2-3 weeks.                                                                                                                                                                                                           | No correlation between weight-normalized CLOZ dosage and CLOZ or NCLOZ levels               | Not reported                                                                                                     | Medical evaluation and questioning of patients, relatives and nurses (present vs absent)                                                             |
| [52] | Not described                                                                                                                                                                                                                                                                                                           | Not reported                                                                                | No correlation                                                                                                   | Lab liver function tests                                                                                                                             |
| [53] | Patients on stable dose, receiving clozapine for at least 3 months, therefore after titration                                                                                                                                                                                                                           | Not reported                                                                                | No correlation                                                                                                   | Measure of Colonic Transit Time (CTT) using radiopaque markers (ROM)                                                                                 |
| [54] | Stable dosage                                                                                                                                                                                                                                                                                                           | Not reported                                                                                | No correlation                                                                                                   | Identification of laxative users by reviewing patient records, contacting GPs, interviewing 20% of the sample.                                       |
| [36] | Stable dosage for at least 2 weeks before testing blood counts                                                                                                                                                                                                                                                          | Positive correlation between CLOZ dosage and CLOZ and NCLOZ levels ( $r=0.56$ , $p<0.001$ ) | No correlation                                                                                                   | White cell and granulocyte counts                                                                                                                    |
| [37] | Initiation at 25 to 50 mg                                                                                                                                                                                                                                                                                               | Positive correlation between CLOZ dosage and blood                                          | No correlation                                                                                                   | Blood count measures                                                                                                                                 |

|      |                                                                                                                                   |                                                                                                                                   |                                                                   |                                                                                                                                                                                                                                                      |
|------|-----------------------------------------------------------------------------------------------------------------------------------|-----------------------------------------------------------------------------------------------------------------------------------|-------------------------------------------------------------------|------------------------------------------------------------------------------------------------------------------------------------------------------------------------------------------------------------------------------------------------------|
|      | daily in divided doses given every 12 hours, and increase by 25 mg every 12 hours 3 times a week according to clinical indication | CLOZ( $r=0.68$ ) and NCLOZ( $r=0.64$ ) levels ( $p<0.001$ )                                                                       |                                                                   |                                                                                                                                                                                                                                                      |
| [78] | Treatment at steady state                                                                                                         | Not reported                                                                                                                      | Not reported                                                      | Blood laboratory test for blood cell counts                                                                                                                                                                                                          |
| [38] | Titration over a period of 9 weeks, with final dose 75mg-600mg                                                                    | Positive correlation between CLOZ dosage and CLOZ levels ( $r=0.34$ , $p=0.00002$ ), but not between CLOZ dosage and NCLOZ levels | No correlation                                                    | Leucocyte and neutrophil counts                                                                                                                                                                                                                      |
| [69] | Not described                                                                                                                     | Not reported                                                                                                                      | Not reported                                                      | Neutrophil counts                                                                                                                                                                                                                                    |
| [67] | Stable dosage                                                                                                                     | Not reported                                                                                                                      | Positive correlation with neutrophil but not with leukocyte count | Blood laboratory tests                                                                                                                                                                                                                               |
| [55] | Not described                                                                                                                     | Not reported                                                                                                                      | No correlation                                                    | Measuring of anticardiolipin antibodies.                                                                                                                                                                                                             |
| [57] | Stable dosage                                                                                                                     | Not reported                                                                                                                      | No correlation                                                    | UKU Side Effect Rating Scale                                                                                                                                                                                                                         |
| [56] | Relatively stable dosage- only one increment $\pm 50$ mg/d during the last 3 months                                               | Not reported                                                                                                                      | No correlation                                                    | Abnormal Involuntary Movements Scale (AIMS), RDC severity criteria for tardive dyskinesia, Extrapyramidal Side Effects rating scale (EPSE), Barnes Akathisia rating scale (BARS), Antipsychotic Non-Neurological Side Effects Rating Scale (ANNSERS) |



**Table S2.** General scores of adverse effect scales or combinations of adverse effects in relation to clozapine plasma levels.

| Reference | Type of study   | Location | Patients (Males/Females) | Age (Mean) (years)    | Race                                                                          | Diagnosis                                    | Comedication                                                                                                             | Averaged serum levels of clozapine (ng/ml)                    | Duration of CLOZ exposure         | Reported Side effects                                                                                                                                                                                         | Correlation to CLOZ plasma levels                                                                                                                                                                                                                                                                                                                                                                     | Jadad score |
|-----------|-----------------|----------|--------------------------|-----------------------|-------------------------------------------------------------------------------|----------------------------------------------|--------------------------------------------------------------------------------------------------------------------------|---------------------------------------------------------------|-----------------------------------|---------------------------------------------------------------------------------------------------------------------------------------------------------------------------------------------------------------|-------------------------------------------------------------------------------------------------------------------------------------------------------------------------------------------------------------------------------------------------------------------------------------------------------------------------------------------------------------------------------------------------------|-------------|
| [56]      | Cross-sectional | UK       | 103 (71/32)              | 39.3±8.8              | White: 60 (58%)                                                               | Schizophrenia (n=101), Schizoaffective (n=2) | Mood stabilizer (31%), Anticholinergic (18%), antidepressant (16%) other antipsychotic (5%), anxiolytic or hypnotic (5%) | CLOZ: 530 ±370, NCLOZ: 310 ±190                               | Median (range): 30 (3-156) months | Parkinsonism (18%), Akathisia (4%), Tardive Dyskinesia (5%), Non neurological side effects including cardiovascular, gastrointestinal, sexual genitourinary and others (moderate/severe, ≥1: 77% of patients) | Positive but weak correlation between CLOZ levels and total ANSSERS score (Pearson correlation=0.29, p<0.004), and between CLOZ levels and number of moderate and severe side effects (Pearson correlation=0.23, p<0.03) Patients with CLOZ levels over 250ng/ml were more likely to have ≥1 moderate or severe side effects than those with concentrations below this level (63/76 vs 12/23, p<0.01) |             |
| [43]      | Open label      | USA      | 6 (2/ 4)                 | 13.3±2.7 (range 9-16) | Caucasians (n=2) Afro-Americans (n=2), Hispanic (n=1), Pacific Islander (n=1) | Childhood onset schizophrenia                | No concomitant medications                                                                                               | Crude (ng/mL): 289 ± 116, Normalized (ng/mL-mg-Kg): 99 ± 37.3 | 6 weeks                           | Adverse effects included sedation (1/6), enuresis (1/6), tachycardia (4/6), sialorrhea (5/6), reduced neutrophil count (1/6), increased hepatic transaminases (1/6).                                          | Total number of moderate/severe side effects correlated positively with CLOZ+NCLOZ (r=0.4, p=0.002), NCLOZ (r=0.6, p=0.002), and CLOZ+NCLOZ+NOX levels (r=0.4, p=0.03)                                                                                                                                                                                                                                | 0           |

|      |                             |       |                                |                        |               |                                                                                                                                      |                                            |                                                                                                                  |                  |                                                                                                                  |    |   |
|------|-----------------------------|-------|--------------------------------|------------------------|---------------|--------------------------------------------------------------------------------------------------------------------------------------|--------------------------------------------|------------------------------------------------------------------------------------------------------------------|------------------|------------------------------------------------------------------------------------------------------------------|----|---|
|      |                             |       |                                |                        |               |                                                                                                                                      |                                            |                                                                                                                  |                  | Number of side effects: 3.8±0.75, Number of moderate/severe side effects: 2.5±1.0                                |    |   |
| [46] | Prospective, open follow-up | Italy | 45 completed the study (35/10) | 19-65                  | Not specified | Chronic schizophrenia                                                                                                                | No Comedication allowed                    | CLOZ: 385±183 (range 147-974)<br>NCLOZ: 174±84 (range: 43-445)                                                   | 12 weeks         | Hypersalivation (n=3), constipation (n=3), tachycardia (n=2), dizziness (n=1), sedation (n=4), weight gain (n=3) | No | 1 |
| [41] | Cross-sectional             | USA   | 44 (33/ 11)                    | 36.6±9.1 (range 20-54) | Not specified | Schizophrenia (43%), schizoaffective bipolar (32%), bipolar (14%), schizoaffective depressed (7%), major depression- psychotic (4%), | benzodiazepines, lithium, antidepressants, | CLOZ: mean=297 (median: 291), among 68 samples. Subsample not exposed to fluoxetine or valproate (n=27): 239±159 | 2.15± 2.30 years | SAFTEE scale ADRs                                                                                                | No | 0 |

**Table S3.** Nervous system and psychiatric adverse effects in relation to CLOZ plasma levels.

| Neurologic and Psychiatric Adverse Effects |                                     |             |                                 |                          |                            |                                                            |                                                                                                                                                                                           |                                                                                                 |                         |                                                                                                                                                                                                                                   |                                                                                                                                                                                                                                                                                                                                                                                                                                                                                                                                                                |                |
|--------------------------------------------|-------------------------------------|-------------|---------------------------------|--------------------------|----------------------------|------------------------------------------------------------|-------------------------------------------------------------------------------------------------------------------------------------------------------------------------------------------|-------------------------------------------------------------------------------------------------|-------------------------|-----------------------------------------------------------------------------------------------------------------------------------------------------------------------------------------------------------------------------------|----------------------------------------------------------------------------------------------------------------------------------------------------------------------------------------------------------------------------------------------------------------------------------------------------------------------------------------------------------------------------------------------------------------------------------------------------------------------------------------------------------------------------------------------------------------|----------------|
| Referenc<br>e                              | Type of<br>study                    | Location    | Patients<br>(Males/Females<br>) | Age<br>(Mean)<br>(years) | Race                       | Diagnosis                                                  | Comedication                                                                                                                                                                              | Averaged serum levels of<br>clozapine (ng/ml)                                                   | Duration                | Reported Side effects                                                                                                                                                                                                             | Correlation to clozapine<br>plasma levels                                                                                                                                                                                                                                                                                                                                                                                                                                                                                                                      | Jadad<br>score |
| [34]                                       | prospective<br>randomized           | USA         | 50 (39/11)                      | 38 (range: 21-56)        | white(n=26)<br>black(n=24) | chronic<br>schizophrenia or<br>schizoaffective<br>disorder | No sedative medications<br>permitted (barbiturates,<br>benzodiazepines)<br>Rarely given doses of<br>haloperidol or<br>fluphenazine during the<br>first 2 weeks of clozapine<br>titration. | group I (n=16): 50-150<br>group II (n=22): 200-300,<br>group III (n=12): 350-450                | 12 weeks                | Seizures: 3/50 (6%) (2<br>patients with<br>preexisting history of<br>seizures)<br>EEG abnormalities,<br>Overall: 24/45 (53%),<br>More severe than<br>borderline: 15/45<br>(33%).<br>Spike/sharp activity<br>Slowing<br>Sleepiness | EEG abnormalities, more<br>severe than borderline, rate:<br>group III: 73%vs Group I:<br>(20%) and Group II: 21%<br>(p=0.006)<br>Severity: group I 0.9±1.8,<br>group II 1.0±1.5, group III<br>3.4±1.9 (p<0.001)<br>Spike/sharp activity: no<br>correlation<br>Slowing: more slowing in<br>group III vs group II and I<br>(p=0.049), positive<br>correlation with levels<br>(r=0.44, p=0.002), possible<br>cutoff: 300ng/ml<br>Sleepiness: positive<br>correlation with levels<br>(r=0.33, p=0.029).<br>The EEG slowing correlated<br>with observed sleepiness. | 2              |
| [58]                                       | Prospective,<br>observational       | Austria     | 29 (18/ 11)                     | 31.7±10.2                | Not specified              | Schizophrenia<br>(n=22)<br>Schizoaffective<br>(n=7)        | No psychotropic<br>/anticholinergic<br>comedication allowed                                                                                                                               | Whole Sample(n=29):<br>161.3±150.0 Group 1 (n=14):<br>81.6±64.6, Group 2 (n=15):<br>235.7±169.8 | 20.2±16.8<br>days       | EEG alterations (53%),<br>with categorization of<br>severity.<br>Severe changes with<br>intermittent spark<br>transients: 27.6%.<br>No seizures observed.                                                                         | Plasma levels significantly<br>different among groups<br>according to severity of EEG<br>changes.<br>Group 1(n=14): degree 0-1 ,<br>plasma levels: 81.6±64.6<br>ng/ml (95%CI=44.3-118.9).<br>Group 2 (n=15): degree 2-4,<br>plasma levels: 235.7±169.8<br>mg.ml (95% CI: 141.7-329.7)<br>(p=0.0009)                                                                                                                                                                                                                                                            | 0              |
| [35]                                       | Cross-<br>sectional,<br>blinded for | Denmar<br>k | 30 (21/ 9)                      | 37,6 ± 1,67              | Not specified              | Schizophrenia                                              | No other neuroleptic<br>allowed except<br>levomepromazine or                                                                                                                              | Median CLOZ: 351 (231-<br>615) (range: 64-1824)                                                 | 2.5 (1.0-<br>9.0) years | EEG changes                                                                                                                                                                                                                       | Severity correlated to<br>plasma CLOZ (r = 0.43; P <<br>0.05) but not NCLOZ levels.                                                                                                                                                                                                                                                                                                                                                                                                                                                                            | 0              |

|      |                                                                                               |           |             |                                |                                                                                |                                                                                                                                     |                                                                                                                                                                                                                |                                                                                                                                                                                             |                                                        |                                                                                                                                                                                      |                                                                                                                                                                                                            |   |
|------|-----------------------------------------------------------------------------------------------|-----------|-------------|--------------------------------|--------------------------------------------------------------------------------|-------------------------------------------------------------------------------------------------------------------------------------|----------------------------------------------------------------------------------------------------------------------------------------------------------------------------------------------------------------|---------------------------------------------------------------------------------------------------------------------------------------------------------------------------------------------|--------------------------------------------------------|--------------------------------------------------------------------------------------------------------------------------------------------------------------------------------------|------------------------------------------------------------------------------------------------------------------------------------------------------------------------------------------------------------|---|
|      | EEG measures                                                                                  |           |             |                                |                                                                                |                                                                                                                                     | chlorprothixene for sedation up to 100mg/day. Other medication as usual                                                                                                                                        |                                                                                                                                                                                             |                                                        |                                                                                                                                                                                      | CLOZ concentrations $\geq 1306$ ng/ml lead to progressive gradual EEG changes                                                                                                                              |   |
| [39] | Prospective, randomized, double-blind                                                         | USA       | 56 (41/15)  | 3 (range 21-56)                | Not specified                                                                  | Schizophrenia                                                                                                                       | All psychoactive medication tapered off, except for haloperidol and phluphenazine and an antiparkinsonian agent. Two patients with a history of seizures stayed on valproate throughout the study.             | low: 91 $\pm$ 15 (50-150), medium: 251 $\pm$ 13 (200-300), high: 396 $\pm$ 16 (350-450)                                                                                                     | 12 weeks                                               | Sleepiness (score>1) in serum level to correlate at 38% and 30% on weeks week 6 (p=0.08), but no significance at week 12. EPS improved overtime, with no group-by-time interactions. | 2                                                                                                                                                                                                          |   |
| [40] | Prospective, longitudinal, observational , partly double-blind(n=22) partly open label (n=32) | USA       | 54 (34/ 20) | Range: 8-18                    | white (n=25) African American (n=17), Hispanic (n=4), Asian (n=2), other (n=6) | Childhood-onset schizophrenia                                                                                                       | Medication washout and medication free period of 1-3 weeks prior treatment                                                                                                                                     | Week 6: clz 455 $\pm$ 285.1, nor c+lz 302.4 $\pm$ 142.2                                                                                                                                     | 6 week treatment at first and then 2-6 years follow-up | EEG abnormalities on week 6: Slowing 11%, epileptiform 11%, seizures: 6%. Akathisia: 15%.                                                                                            | Rates of side effects were not directly associated with CLZ or nor CLZ blood levels or their ratio.                                                                                                        | 0 |
| [41] | cross-sectional                                                                               | USA       | 44 (33/ 11) | 36.6 $\pm$ 9.1 (range 20-54)   | Not specified                                                                  | Schizophrenia (43%), Schizoaffective bipolar (32%), Bipolar (14%), Schizoaffective depressed (7%), Major depression-psychotic (4%), | Medicines allowed:benzodiazepines , lithium, antidepressants, other medically indicated agents, except drugs known to alter clearance of neuroleptics, i.e phenytoin and cimetidine                            | CLOZ: mean=297 (median: 291), among 68 samples. Subsample not exposed to fluoxetine or valproate (n=27): 239 $\pm$ 159                                                                      | 2.15 $\pm$ 2.30 years                                  | Sedation (presence vs absence)                                                                                                                                                       | No                                                                                                                                                                                                         | 0 |
| [42] | Prospective, non randomized, double blind, observational                                      | Hong-Kong | 51 (38/ 13) | 37.61 $\pm$ 8.68 (range 21-63) | Not specified                                                                  | Schizophrenia (n=48) and schizoaffective (n=3),                                                                                     | No psychotropics or anticholinergics allowed. Chloral hydrate allowed for sedation Lorazepam needed short term in two patients Valproate was given to patients with epileptiform activity in EEG, mvoclonus or | Week 6: Clozapine: 470.20 $\pm$ 234.2,range 100-1220 Norclozapine:233.06 $\pm$ 105.56 , range 70-670, Week 12: cloz 681 $\pm$ 390.71, range 220-1920, NCLOZ: 297.8 $\pm$ 146.49 range 8-720 | 12 weeks                                               | EEG abnormalities, BARS, AIMS, SAS scores(akathisia, extrapyramidal symptoms)                                                                                                        | No significant correlation between plasma levels and EEG abnormalities on week 6, BARS, AIMS, SAS scores on weeks 6 and 12, Negative correlation with sedation at week 6, which was clinically implausible | 0 |



|      |                                                                      |        |                                        |                                         |                                                                                       |                                                                                                                                                                         |                                                                                                                          |                                                                                                                                         |                                   |                                                                                                                                         |                                                                                                                                                                                                                                         |   |
|------|----------------------------------------------------------------------|--------|----------------------------------------|-----------------------------------------|---------------------------------------------------------------------------------------|-------------------------------------------------------------------------------------------------------------------------------------------------------------------------|--------------------------------------------------------------------------------------------------------------------------|-----------------------------------------------------------------------------------------------------------------------------------------|-----------------------------------|-----------------------------------------------------------------------------------------------------------------------------------------|-----------------------------------------------------------------------------------------------------------------------------------------------------------------------------------------------------------------------------------------|---|
| [68] | Single-blind, cross-sectional                                        | Spain  | 19 (11/ 8)                             | Group I: 45 ±10.3, Group II: 47.2 ± 7.5 | Not specified                                                                         | Schizophrenic Disorder or Schizoaffective disorder                                                                                                                      | No psychotropic comedication                                                                                             | Group I: Clz ≥300<br>Group II: Clz <300                                                                                                 | ≥ 5 years                         | cognitive performance                                                                                                                   | No relationship between clozapine plasma levels and cognitive performance. Tendency to significance regarding the executive test (31% of variability of number of attempts in the WCST was explained by clozapine plasma levels)        | 0 |
| [43] | Open label                                                           | USA    | 6 (2/ 4)                               | 13.3±2.7 (range 9-16)                   | Caucasians (n=2)<br>AfroAmericans (n=2),<br>Hispanic (n=1),<br>Pacific Islander (n=1) | Childhood onset schizophrenia                                                                                                                                           | No concomitant medications                                                                                               | Crude (ng/mL): 289 ± 116, Normalized (ng/mL-mg-Kg): 99 ± 37.3                                                                           | 6 weeks                           | Adverse effects included sedation (1/6), among others.                                                                                  |                                                                                                                                                                                                                                         | 0 |
| [59] | Retrospective analysis of clinically collected cross-sectional data. | Canada | 73 (48/ 25)                            | 41.6 ± 12.0                             | Not specified                                                                         | Schizophrenia (n= 52, 71.2%)<br>Schizoaffective disorder (n=11, 15.1%),<br>Psychotic disorder not otherwise specified (n= 9, 12.3%)<br>Delusional disorder (n= 1, 1.4%) | Not reported                                                                                                             | All subjects (n=73): 458.5 ± 248.8<br>Low cognitive impairment (n=57): 437.1 ± 249.6<br>High cognitive impairment (n=16): 534.7 ± 237.7 | ≥3 months                         | cognitive impairment                                                                                                                    | Sixteen subjects (21.9%) had high cognitive impairment and the rest had low cognitive impairment. Age and clozapine levels were associated with high cognitive impairment, as well as clozapine/desmethylclozapine ratio (OR: 7.3). Yes | 0 |
| [56] | Cross-sectional                                                      | UK     | 103 (71/32)                            | 39.3±8.8                                | White: 60 (58%)                                                                       | Schizophrenia (n=101), Schizoaffective (n=2)                                                                                                                            | Mood stabilizer (31%), Anticholinergic (18%), antidepressant (16%) other antipsychotic (5%), anxiolytic or hypnotic (5%) | CLOZ: 530 ±370, NCLOZ: 310 ±190                                                                                                         | Median (range): 30 (3-156) months | Memory and concentration problems (38%), Nighttime sleep problems (32%)<br>Parkinsonism (18%), Akathisia (4%), Tardive Dyskinesia (5%), | No correlation                                                                                                                                                                                                                          | 1 |
| [62] | Double-blind, prospective.                                           | USA    | 40 (39 completers), (sex not reported) | not reported                            | Not specified                                                                         | Schizophrenia and schizoaffective disorder                                                                                                                              | After a 4 week Haloperidol trial and 1 week wash out,                                                                    | End of first trial (16 weeks): 335±340                                                                                                  | First trial: 16 weeks, second     | serum antimuscarinic activity, drowsiness/sedation (present vs absent)                                                                  | Clozapine levels were very good predictors of serum antimuscarinic activity in doses of 300 mg/d or higher.                                                                                                                             | 2 |



**Table S4.** Cardiovascular adverse effects in relation to CLOZAPINE blood levels.

| Reference | Type of study                                                                                | Location  | Patients (Males/Females) | Age (Mean)                 | Race                                                       | Diagnosis                                       | Comedication                                                                                                                                                                                       | Averaged serum levels of clozapine (ng/ml)                                                                                                                                                                      | Duration                                               | Reported Side effects                                                                                                                                       | Correlation to clozapine plasma level | Jadad score |
|-----------|----------------------------------------------------------------------------------------------|-----------|--------------------------|----------------------------|------------------------------------------------------------|-------------------------------------------------|----------------------------------------------------------------------------------------------------------------------------------------------------------------------------------------------------|-----------------------------------------------------------------------------------------------------------------------------------------------------------------------------------------------------------------|--------------------------------------------------------|-------------------------------------------------------------------------------------------------------------------------------------------------------------|---------------------------------------|-------------|
| [35]      | Cross-sectional                                                                              | Denmark   | 30 (21/ 9)               | 37,6 ± 1,67                | Not specified                                              | Schizophrenia                                   | No other neuroleptic allowed except levomepromazine or chlorprothixene for sedation up to 100mg/day. Other medication as usual                                                                     | Median S-Clozapine: 351 (231-615) (range: 64-1824)                                                                                                                                                              | 2.5 (1.0-9.0) years                                    | Increased pulse rate(>80bpm): 73%, Tachycardia (>100bpm): 23%<br>Orthostatic hypotension: 17%                                                               | No                                    | 0           |
| [39]      | Prospective, randomized, double-blind                                                        | USA       | 56 (41/15)               | 38 (range 21-56)           | Not specified                                              | Schizophrenia                                   | All psychoactive medication tapered off, except for haloperidol and phluphenazine and an antiparkinsonian agent. Two patients with a history of seizures stayed on valproate throughout the study. | low: 91±15 (50-150), medium: 251±13 (200-300), high: 396±16 (350-450)                                                                                                                                           | 12 weeks                                               | Tachycardia: 48%(n=27)<br>Orthostatic hypotension: 5%(n=3)<br>No significant relationships between plasma levels and tachycardia or orthostatic hypotension | No                                    | 2           |
| [40]      | Prospective, longitudinal, observational, partly double-blind(n=22) partly open label (n=32) | USA       | 54 (34/ 20)              | Range: 8-18                | 25 white, 17 African American, 4 Hispanic, 2 Asian 6 other | Childhood-onset schizophrenia                   | Medication washout and medication free period of 1-3 weeks prior treatment                                                                                                                         | Week 6: clz 455±285.1, clz 302.4±142.2                                                                                                                                                                          | 6 week treatment at first and then 2-6 years follow-up | Hypertension (>140/90mmHg): 6%, Orthostatic hypotension: 7%, Tachycardia (>120bpm): 28%                                                                     | No                                    | 0           |
| [42]      | Prospective, non randomized, double blind, observational                                     | Hong-Kong | 51 (38/ 13)              | 37.61 ± 8.68 (range 21-63) | Unspecified                                                | Schizophrenia (n=48) and schizoaffective (n=3), | No psychotropics or anticholinergics allowed. Chloral hydrate allowed for sedation Lorazepam needed short term in two patients Valproate was given to patients with epileptiform activity          | Week 6: Clozapine:470.20±234.23, range 100-1220<br>Norclozapine:233.06±105.56, range 70-670,<br>Week 12: clozapine 681± 390.71 ng/mL (range 220-1920 ng/mL),<br>norclz 297.8 ± 146.49 ng/mL (range 8-720 ng/mL) | 12 weeks                                               | QTc alterations                                                                                                                                             | no                                    | 0           |





|      |                                       |           |                |             |               |                                                                                                                   |                                                                                |                                            |                             |                                                                                                                                                                                                                                                                                        |   |
|------|---------------------------------------|-----------|----------------|-------------|---------------|-------------------------------------------------------------------------------------------------------------------|--------------------------------------------------------------------------------|--------------------------------------------|-----------------------------|----------------------------------------------------------------------------------------------------------------------------------------------------------------------------------------------------------------------------------------------------------------------------------------|---|
|      |                                       |           |                |             |               |                                                                                                                   |                                                                                |                                            |                             | Temperature was inversely related to clozapine dose (p<0.003). Higher nor-clozapine to clozapine ratios were associated with higher BP measures (p=0.002). The magnitude of these relationships is weak (r<0.30). There is a tendency to autonomic dysregulation during clozapine use. |   |
| [80] | Cohort, prospective study, open       | Australia | 503 (397/ 106) | 44±12       | not specified | Schizophrenia                                                                                                     | Not reported                                                                   | 475±236                                    | Mean follow-up of 9±6 years | Myocarditis: 3%(n=14), at 14±7 days, with mean clozapine level 297±152. No Sudden death: 2%(n=10), at 5±4 years, mean clozapine level 439±198.                                                                                                                                         | 0 |
| [79] | Retrospective, review of case records | Spain     | 82 (58/24)     | 31.21 ±9.59 | not specified | schizophrenia (n=65), schizoaffective (n=10), Psychotic disorder NOS (N=2), Bipolar (N=4), Major Depression n=1). | None: 52.44% Antidepressants: 19.51% Mood stabilizers:31.71% Stimulants: 1.22% | CLZ: 305.56±299.64, nor CLZ: 160.23±105.12 | 18 weeks                    | No significant interaction between clozapine levels>400ng/ml and QTc proloration. No differences detected in the prevalence of prolonged QTc or in mean QTc before and after clozapine treatment.                                                                                      | 1 |

|      |                               |         |                                                                                               |                                                            |               |                                         |                                                                        |                                          |                                                                                                                                                                                                                                                                                                                                                                                                                                                                             |                        |                                     |   |
|------|-------------------------------|---------|-----------------------------------------------------------------------------------------------|------------------------------------------------------------|---------------|-----------------------------------------|------------------------------------------------------------------------|------------------------------------------|-----------------------------------------------------------------------------------------------------------------------------------------------------------------------------------------------------------------------------------------------------------------------------------------------------------------------------------------------------------------------------------------------------------------------------------------------------------------------------|------------------------|-------------------------------------|---|
| [76] | Preliminary prospective study | Italy   | 20 initially, 15 completers (5 discontinued due to siallorhea, nausea, or hypotension) (8 /7) | 35.5±11.0                                                  | not specified | Schizophrenia                           | One other antipsychotic, one mood-stabilizing drug or a benzodiazepine | CLZ: 124±70.8 nor CLZ: 52.3±35.7 4 weeks | Heart Rate increased significantly by an average of 10.4% (p=0.013), 20% of cases had > 100/min PAP was >33mmHg in 13.3% of cases A-wave velocity exceeded 77cm/sec in 26.7% of cases, Myocardial Performance Index (MPI) exceeded 0.44 in 100% of cases. E/A ratio was normal (100%) Overall findings consistent with lees efficient LV functioning, in a large poportion of patients with low to moderate clozapine serum levels. No dose-response relationship mentioned | No                     | 0                                   |   |
| [72] | Cross-sectional               | Germany | 80 Clozapineapine: 40 (20/20) Healthy controls: 40 (20/20)                                    | Patients: 40.7 (range:21-68) Controls: 41.2 (range: 20-64) | Not reported  | Schizophrenia Schizoaffective disorder  | none                                                                   | 290                                      | >8 weeks                                                                                                                                                                                                                                                                                                                                                                                                                                                                    | HRV                    | Yes, negative (inverse) correlation | 0 |
| [73] | retrospective                 | Germany | 33 (19/14) (Total sample: 65)                                                                 | 42.1 (range: 19-73)                                        | Not reported  | Schizophrenia, schizoaffective disorder | Haloperidol, benzodiazepines, SSRIs, Carbamazepine                     | 331±294 (range:65-1475)                  | >1 week                                                                                                                                                                                                                                                                                                                                                                                                                                                                     | HRV                    | Yes, negative (inverse) correlation | 0 |
| [48] | Cross-sectional               | Sweden  | 30 (20/10)                                                                                    | 33.5 (range: 26-41)                                        | Not reported  | Not reported                            | Not reported                                                           | 451 (range: 337-569) (n=29)              | 7 (range:3-13)                                                                                                                                                                                                                                                                                                                                                                                                                                                              | Persistent Tachycardia | No                                  | 0 |

**Table S5.** Metabolic and endocrine adverse effects in relation to clozapine plasma levels.

| Reference | Type of study                        | Location             | Patients (Male/ Female) | Age (Mean) (Years)                                                  | Race                                            | Diagnosis                                      | Comedication | Averaged serum levels of clozapine (ng/ml)      | Duration                                                                  | Reported side effects                                                                                                                                                      | Correlation to clozapine plasma levels                                                                                                                                                                                                                              | Jadad score |
|-----------|--------------------------------------|----------------------|-------------------------|---------------------------------------------------------------------|-------------------------------------------------|------------------------------------------------|--------------|-------------------------------------------------|---------------------------------------------------------------------------|----------------------------------------------------------------------------------------------------------------------------------------------------------------------------|---------------------------------------------------------------------------------------------------------------------------------------------------------------------------------------------------------------------------------------------------------------------|-------------|
| [63]      | Prospective double-blind randomized  | USA                  | 50 (22/28)              | 44.8±9.6                                                            | Caucasian (n=43)<br>African American (n=7)      | Schizophrenia (n=39)<br>Schizoaffective (n=11) | None         | CLOZAPINE:> 350 in responders                   | 29.7 ± 13.2 weeks(16 weeks, 32 weeks, 48 weeks, based on response status) | Weight gain (mean=1.6 kg)                                                                                                                                                  | Non significant for CLOS and NCLOZAPINE levels. In nonsmokers (n = 8) and after controlling for baseline BMI, sex, and clozapine levels, the positive partial correlation between weight gain and NCLOZAPINE levels, r = 0.89 (P = 0.046).                          |             |
| [81]      | Prospective observational open-label | Ireland, UK          | 49 (33/16)              | 37.4 ±9.3, (range 22–57)                                            | Not specified                                   | Schizophrenia                                  | Not reported | 500±280 (range 70–1360).                        | 32.6 ± 6.6 weeks (23-62 weeks)                                            | Weight gain, waist circumference, fasting total serum cholesterol, serum TG, LDL cholesterol and HDL cholesterol (correlation testing reported only for serum TG increase) | No correlations were found between change in serum TG levels and serum clozapine levels (r=−0.04, p=0.77) at follow-up                                                                                                                                              | 0           |
| [65]      | Cross-sectional                      | Australia, Singapore | 40 (18/22)              | 38.2 ± 11.3 (range 22-74) ); Caucasians:40.2±8.6, Asians:36.3± 13.4 | Caucasians [ n=20, (16/4)] Asians [n=20 (2/18)] | Schizophrenia                                  | Not reported | Caucasians: 415.3 ±185.8<br>Asians: 417.1±290.8 | ≥6 months                                                                 | Lipid profiles, fasting glucose levels                                                                                                                                     | No correlation found between CLOZAPINE levels and total cholesterol, LDL, triglyceride or serum glucose levels                                                                                                                                                      | 0           |
| [70]      | Cross-sectional                      | Sweden               | 34 (13/5)               | 46 (29-63)                                                          | Not specified                                   | Schizophrenia, schizoaffective disorder        | Not reported | Median: 359.1 (range 60.5–810.46)               | At least 6 months<br>Median: 5.3 years (range 0.5–16.3 years)             | Fasting blood samples for insulin, C-peptide, insulin-like growth factor I, insulin-like growth factor binding protein-1, leptin, glucose and lipids                       | Positive correlation between CLOZAPINE levels and levels of insulin, C-peptide (r=0.51, P=0.03 and r=0.48, P=0.04, respectively), and triglycerides ((rs=0.50, P=0.03), but not with NCLOZAPINE levels.. No correlation between CLOZAPINE or NCLOZAPINE levels with | 0           |

|      |                   |        |                                                                      |                                                                    |                                                  |                                                                                  |                                                                                                                                                                                   |                                                                                                                                                                                                                                                                                                                     |                                                                             |                                                                                                                                                                                    |                                                                                                                                                                                   |   |
|------|-------------------|--------|----------------------------------------------------------------------|--------------------------------------------------------------------|--------------------------------------------------|----------------------------------------------------------------------------------|-----------------------------------------------------------------------------------------------------------------------------------------------------------------------------------|---------------------------------------------------------------------------------------------------------------------------------------------------------------------------------------------------------------------------------------------------------------------------------------------------------------------|-----------------------------------------------------------------------------|------------------------------------------------------------------------------------------------------------------------------------------------------------------------------------|-----------------------------------------------------------------------------------------------------------------------------------------------------------------------------------|---|
|      |                   |        |                                                                      |                                                                    |                                                  |                                                                                  |                                                                                                                                                                                   |                                                                                                                                                                                                                                                                                                                     |                                                                             |                                                                                                                                                                                    | IGF-I, IGFBP-1, leptin, glucose, cholesterol, HDL, LDL.                                                                                                                           |   |
| [49] | Cross-sectional   | Sweden | 41 (7/6)                                                             | 35 (26-47)                                                         | Not mentioned                                    | Schizophrenia, schizoaffective disorder, delusional disorder                     | Comparison between clozapine and classical antipsychotics (perphenazine or zuclopenthixol)                                                                                        | 28.8-721                                                                                                                                                                                                                                                                                                            | 2.7 (range 0.5-7.3 years)                                                   | Fasting blood samples for glucose, insulin, growth hormone (GH)-dependent insulin-like growth factor I (IGF-I), and insulin-dependent insulin-like growth factor binding protein-1 | insulin levels positively correlated to the serum CLOZAPINE concentration                                                                                                         | 0 |
| [50] | Open, prospective | USA    | 74 (46/28). Plasma clozapine levels determined in a subsample (n=26) | Males: 34.7±8.1 Females: 36.2±11.6                                 | Not specified                                    | Schizophrenia                                                                    | Benzotropine (n=6), diphenylhydantoin (n=2), fluoxetine (n=1), divalproate (n=1)                                                                                                  | 6 weeks: 388±242<br>6 months: 444±355                                                                                                                                                                                                                                                                               | 6 months                                                                    | Weight gain                                                                                                                                                                        | No                                                                                                                                                                                | 0 |
| [51] | Cross-sectional   | Canada | 60 (47/13)                                                           | 36.5±11.3                                                          | Caucasian (93%) Asian (n=2), First Nations (n=2) | Schizophrenia (n=46), schizoaffective disorder (n=13), delusional disorder (n=1) | Antipsychotics (61.9%), Antidepressants (14.3%), Mood stabilizers (21.4%)                                                                                                         | CLOZAPINE: 1613.57±976.05<br>NCLOZAPINE: 964.60±976.05                                                                                                                                                                                                                                                              | Stable clozapine therapy for at least 6 months                              | Metabolic syndrome BMI (obese/overweight)                                                                                                                                          | No correlation with bmi/ Positive correlation with metabolic syndrome. 11% increase in the odds per 100ng/ml, levels 1.5 times higher in those with vs without metabolic syndrome | 0 |
| [74] | retrospective     | UK     | 100 (59/41)                                                          | Males: 36.9 (95% CI: 33.9-39.8)<br>Females: 39 (95% CI: 35.4-42.7) | Not reported                                     | Schizophrenia (n=82)<br>Schizoaffective disorder (n=18)                          | Aripiprazole (n=6)<br>Amisulpride (n=4)<br>Haloperidol (n=2)<br>Of the females: oestrogen containing contraceptive pill (n=5), oestrogen containing hormone replacement treatment | CLOZAPINE: Males: 440 (10 <sup>th</sup> -90 <sup>th</sup> percentile: 260-700)<br>Females: 490 (10 <sup>th</sup> -90 <sup>th</sup> percentile: 270-790)<br>NCLOZAPINE: Males: 310 (10 <sup>th</sup> -90 <sup>th</sup> percentile: 260-350)<br>Females: 310 (10 <sup>th</sup> -90 <sup>th</sup> percentile: 270-340) | Males: 4.4 (95% CI: 1.2-10.3) years<br>Females: 5.1 (95% CI: 2.3-7.9) years | BMI<br>Fasting blood glucose<br>HDL                                                                                                                                                | Yes, positive with BMI and fasting blood glucose<br>Not with HDL                                                                                                                  | 0 |
| [45] | Cross-sectional   | Sweden | 17 (12/5)                                                            | Median: 41 (range: 29-36)                                          | Caucasian                                        | Schizophrenia (n=16)<br>Schizoaffective disorder (n=1)                           | Benzodiazepines (n=4), and/or levomepromazine (n=3) and/or lithium (n=1)                                                                                                          | CLOZAPINE: 392 (69-918)<br>NCLOZAPINE: 288 (88-641)                                                                                                                                                                                                                                                                 | 6.9 years (range: 0.7-16.3 years)                                           | Elevated blood glucose (n=2), elevated levels of insulin (n=10),                                                                                                                   | Positive correlation between CLOZAPINE levels and insulin (r=0.53, p=0.03), C-peptide (r=0.51, p=0.04), and                                                                       | 0 |

|                         |                             |        |                                                                                   |                                                                 |                        |                                                                                                                                      |                                                                                                                                                                                                             |                                                                                                                                                  |                   |                                                                                                                                                                     |                                                                                                                                                                                                                                                                                         |   |
|-------------------------|-----------------------------|--------|-----------------------------------------------------------------------------------|-----------------------------------------------------------------|------------------------|--------------------------------------------------------------------------------------------------------------------------------------|-------------------------------------------------------------------------------------------------------------------------------------------------------------------------------------------------------------|--------------------------------------------------------------------------------------------------------------------------------------------------|-------------------|---------------------------------------------------------------------------------------------------------------------------------------------------------------------|-----------------------------------------------------------------------------------------------------------------------------------------------------------------------------------------------------------------------------------------------------------------------------------------|---|
|                         |                             |        |                                                                                   |                                                                 |                        |                                                                                                                                      |                                                                                                                                                                                                             |                                                                                                                                                  |                   | elevated levels of C-peptide (n=13), elevated triglycerides (n=8), and cholesterol (n=6). Also, homeostasis model assessment index for insulin resistance (HOMA-IR) | triglyceride levels (r=0.46, p=0.06, trend). No correlation with cholesterol. No correlation between NCLOZAPINE levels and hormone or lipid levels.                                                                                                                                     |   |
| [71]                    | Prospective, randomized     | Taiwan | 68 (20/48)<br>Coadministration group: 34 (10/24)<br>Monotherapy group: 34 (10/24) | Coadministration group: 32.9±8.5<br>Monotherapy group: 35.1±9.4 | Han Chinese            | Schizophrenia                                                                                                                        | Medication interfering with body weight, lipid or glucose metabolism or clozapine disposition were not allowed (ie. Lithium, propranolol, carbamazepine, valproate, tricyclic antidepressants, other SSRIs) | Coadministration group: CLOZAPINE: 509.8±281.1<br>NCLOZAPINE: 179.0±95.8<br>Monotherapy group: CLOZAPINE: 502.0±220.6<br>NCLOZAPINE: 242.8±100.3 | 12 weeks          | Serum glucose, cholesterol, and TRG levels<br>Weight gain                                                                                                           | No correlation with CLOZAPINE levels. Significant correlation of weight gain (r=0.27, p=0.026), blood sugar (r=0.34, p=0.005) and TRG levels (r=0.27, p=0.028) with NCLOZAPINE levels. Tendency to correlation between cholesterol levels and NCLOZAPINE levels (r=0.21, p=0.07, trend) | 2 |
| [77]                    | Cross-sectional, controlled | Turkey | 70<br>Patients: 38 (17/21)<br>Controls: (14/18)                                   | Patients: 40.94±10.1<br>5<br>Controls: 40.09±1.67               | Not reported           | Schizophrenia or schizoaffective                                                                                                     | Not reported                                                                                                                                                                                                | CLOZAPINE: 594.90±492.90<br>NCLOZAPINE: 220.33±182.55                                                                                            | At least 4 months | Laboratory blood measures                                                                                                                                           | No correlation with GLU, TG, HDL, LDL, Positive correlation of CLOZAPINE levels with TC (r=0.335, p=0.040)                                                                                                                                                                              | 0 |
| [41]                    | cross-sectional             | USA    | 44 (33/ 11)                                                                       | 36.6± 9.1 (range 20-54)                                         | Not specified          | schizophrenia (43%), schizoaffective bipolar (32%), bipolar (14%), schizoaffective depressed (7%), major depression- psychotic (4%), | Medicines allowed: benzodiazepines, lithium, antidepressants, other medically indicated agents, except drugs known to alter clearance of neuroleptics, i.e phenytoin and cimetidine                         | CLOZAPINE: mean=297 (median: 291), among 68 samples. Subsample not exposed to fluoxetine or valproate (n=27): 239±159                            | 2.15± 2.30 years  | Excess weight                                                                                                                                                       | No                                                                                                                                                                                                                                                                                      | 0 |
| <b>Endocrine system</b> |                             |        |                                                                                   |                                                                 |                        |                                                                                                                                      |                                                                                                                                                                                                             |                                                                                                                                                  |                   |                                                                                                                                                                     |                                                                                                                                                                                                                                                                                         |   |
| [66]                    | Double-blind                | USA    | 35/40 (16/19)                                                                     | 49 females (32-60 years old), 42                                | 90% (17/19) of females | Schizophrenia, schizoaffective disorder                                                                                              | Comparison between haloperidol and                                                                                                                                                                          | 400-1600                                                                                                                                         | 16-week           | Hyperprolactinemia                                                                                                                                                  | For every 100 ng/ml increase in plasma clozapine levels, average increments                                                                                                                                                                                                             | 2 |

|      |                             |         |                                                         |                                            |                                                                                                                                                    |                                                                                                                                                                                |                                                                                                                      |                                   |                                                                           |                                                                                       |                                                                                       |   |
|------|-----------------------------|---------|---------------------------------------------------------|--------------------------------------------|----------------------------------------------------------------------------------------------------------------------------------------------------|--------------------------------------------------------------------------------------------------------------------------------------------------------------------------------|----------------------------------------------------------------------------------------------------------------------|-----------------------------------|---------------------------------------------------------------------------|---------------------------------------------------------------------------------------|---------------------------------------------------------------------------------------|---|
|      | dose-response               |         |                                                         | males (31-58 years old)                    | were Caucasian and 10% (2/19) of females were African-American, 81% (13/16) of males were Caucasian and 19 % (3/16) of males were African-American | clozapine (4 subjects were not treated with Haloperidol for 4-weeks due to history of intolerance to haloperidol so they continued under their baseline typical antipsychotic) |                                                                                                                      |                                   |                                                                           | in prolactin levels of 0.45 ng/ml in females and of 0.15 ng/ml in males were recorded |                                                                                       |   |
| [75] | Cross-sectional             | Finland | 237 (136/101) CLOZAPINE levels measured in 190 (112/78) | 42.5 (20-65)                               | Native Finnish                                                                                                                                     | Schizophrenia, schizophreniform, schizoaffective disorder, delusional disorder                                                                                                 | Clozapine Monotherapy: 65.4%, Clozapine+atypical: 22.5%, Clozapine+typical: 9.7%, Clozapine+typical + atypical: 1.7% | Men (722±366) and women (886±480) | 3-12 months (1.7%), 1-5 years (32.5%), .5 years (57.8%), unspecified (8%) | Menstrual problems                                                                    | No correlation with CLOZAPINE+NCLOZAPIN 1 E concentration                             |   |
| [77] | Cross-sectional, controlled | Turkey  | 70 Patients: 38 (17/21) Controls: (14/18)               | Patients: 40.94±10.15 Controls: 40.09±1.67 | Not reported                                                                                                                                       | Schizophrenia or schizoaffective                                                                                                                                               | Not reported                                                                                                         | 594.90±492.90 220.33±182.55       | At least 4 months                                                         | Laboratory blood measures                                                             | No correlation with TSH, FT4, PRL. Negative correlation with FT3 (r=-0.373, p=0.021). | 0 |

**Table S6.** Gastrointestinal adverse effects in relation to CLOZAPINE blood levels.

| Reference | Type of study                        | Location        | Patients (Males/Females)                         | Age (Mean) (Years)                        | Race          | Diagnosis                                                                                                     | Comedication                                                                                                                                                                                                     | Averaged serum levels of clozapine (ng/ml)                               | Duration                          | Reported Side effects                                                   | Correlation to clozapine plasma levels | Jadad score |
|-----------|--------------------------------------|-----------------|--------------------------------------------------|-------------------------------------------|---------------|---------------------------------------------------------------------------------------------------------------|------------------------------------------------------------------------------------------------------------------------------------------------------------------------------------------------------------------|--------------------------------------------------------------------------|-----------------------------------|-------------------------------------------------------------------------|----------------------------------------|-------------|
| [41]      | Cross-sectional                      | USA             | 44 (33/11)                                       | 36.6± 9.1 (range 20-54)                   | Not specified | Schizophrenia (43%), schizoaffective (32%) bipolar (14%), major depression-psychotic (7%)                     | Medicines Allowed: benzodiazepines, lithium, Antidepressants, other Medically Indicated agents, Except drugs Known to alter Clearance of Neuroleptics, i.e Phenytoin and Cimetidine                              | Median 291, range: 15-726                                                | 2.15± 2.30 years                  | Nocturnal sialorrhea, drooling, parotid swelling Constipation           | No                                     | 0           |
| [46]      | Prospective, observational follow-up | Italy           | 45 completed the study (35/10)                   | 19-65                                     | Not specified | Chronic schizophrenia                                                                                         | No Comedication allowed except for benzodiazepines Occasionally                                                                                                                                                  | CLOZAPINE: 385±183 (range 147-974)<br>NCLOZAPINE: 174±84 (range: 43-445) | 12 weeks                          | Hypersalivation, constipation                                           | No                                     | 1           |
| [52]      | Prospective                          | Austria         | 238 (153/85) Patients on CLOZAPINE: 167 (101/66) | CLOZAPINE subsample: 31.37±11.8           | Not specified | Not reported                                                                                                  | Not reported                                                                                                                                                                                                     | 165.4±163.4                                                              | 18 weeks                          | Pathologic liver function tests (LFTs): SGOT, SGPT, GGT, ALP, Bilirubin | Yes, for SGPT only.                    | 0           |
| [35]      | Cross-sectional, naturalistic        | Aarhus, Denmark | 30 (21/9)                                        | Range 22-55                               | Not mentioned | Schizophrenia (schizoaffective:5, hebephrenic:5, paranoid:8, latent:1, catatonic:2, simplex:2, unspecified:7) | Nortriptyline:1, levomepromazine:5, clonazepam:6, hyoscyamine:4, oxazepam:3, chlorprothixene:1, phenobarbital:1, nitrazepam:1, biperiden:2, orphenadrine:1, benztropine:2, diazepam:2, piroxicam:1, disulfiram:1 | Median: 1076 (range 706-1882)<br>NCLOZAPINE/CLOZAPINE ratio: 0.77±0.17   | Median: 2.5 (range 1.0-9.0) years | Increased liver enzyme activity (increased GGT, ALP, AST, ALT)          | No                                     | 0           |
| [77]      | Cross-sectional, controlled          | Turkey          | 70 Patients: 38 (17/21) Controls: (14/18)        | Patients:40.94±10.15 Controls: 40.09±1.67 | Not reported  | Schizophrenia or schizoaffective disorder                                                                     | Not reported                                                                                                                                                                                                     | 594.90±492.90<br>220.33±182.55                                           | At least 4 months                 | AST, ALT                                                                | No                                     |             |



|      |                                                        |                      |                                                                             |                                                                                      |                                                                          |                                                    |                                                                                                                                                                                                                                                                                   |                                                                                                          |                   |                                                                   |                                                                                                                                                                                                           |   |
|------|--------------------------------------------------------|----------------------|-----------------------------------------------------------------------------|--------------------------------------------------------------------------------------|--------------------------------------------------------------------------|----------------------------------------------------|-----------------------------------------------------------------------------------------------------------------------------------------------------------------------------------------------------------------------------------------------------------------------------------|----------------------------------------------------------------------------------------------------------|-------------------|-------------------------------------------------------------------|-----------------------------------------------------------------------------------------------------------------------------------------------------------------------------------------------------------|---|
| [65] | Cross-sectional                                        | Australia, Singapore | 40 (18/22)<br>; 20 Caucasians (16/4), 20 Asians (2/18)                      | 38.2 ± 11.3 (range 22-74);<br>Caucasians:40.2±8.6, Asians:36.3± 13.4                 | Caucasians [n=20, (16/4)]<br>Asians [n=20 (2/18)]                        | schizophrenia                                      | Not reported                                                                                                                                                                                                                                                                      | Caucasians:415.3±185.8,<br>Asians:417.1±290.8                                                            | ≥6 months         | Elevated levels of alanine (ALT) and aspartate (AST) transferases | No                                                                                                                                                                                                        | 0 |
| [43] | Open-label trial                                       | USA                  | 6 (2/4)                                                                     | 13.3±2.7 (range 9-16)                                                                | Caucasian:2,<br>African American:2,<br>Hispanic:1,<br>Pacific Islander:1 | Childhood-onset schizophrenia                      | No                                                                                                                                                                                                                                                                                | 289±116                                                                                                  | 6 weeks           | increased hepatic transaminase concentration                      | No                                                                                                                                                                                                        | 0 |
| [40] | Data from double-blind and open-label clozapine trials | USA                  | 54 (34/20)                                                                  | 13.5±2.5 (range 7.0-19.1)                                                            | White:25,<br>African American:17,<br>Hispanic:4,<br>Asian:2,<br>Other:6  | Childhood-onset, treatment resistant schizophrenia | Not mentioned                                                                                                                                                                                                                                                                     | 455.6±285.1 (n=46)                                                                                       | 6 weeks           | elevated liver enzymes (AST, ALP, ALT)(4%)                        | No                                                                                                                                                                                                        | 0 |
| [53] | Cross-sectional                                        | New Zealand          | 37 (29/8)<br>[CLOZAPINE group: 20 (14/6)<br>NON-CLOZAPINE group: 17 (15/2)] | 39.3±9.8 (range 20-61)<br>(CLOZAPINE group: 37±8.2, NON CLOZAPINE group: European):2 | Maori:12,<br>Pacific islander:6,<br>Pakeha (NZ European):2               | Schizophrenia                                      | Laxatives (laxsol, polyethylene glycol, lactulose), antipsychotics (risperidone:2, aripiprazole:1, haloperidol:1, amisulpride:7, aripiprazole+quetiapine:1)<br>omeprazole, metformin, cholecalciferol<br><i>*(only 8 patients received clozapine as their sole antipsychotic)</i> | 489±137 (range 284-885)                                                                                  | At least 3 months | Colonic Hypomotility                                              | Positive correlation<br>Clear colonic hypomotility in 80% of CLOZAPINE patients, with Colonic Transit Time (CCT) four times longer than population norms (p<0.0001) and NON CLOZAPINE patients (p<0.0001) | 0 |
| [54] | Retrospective, collection of records                   | UK                   | 202 (141/61)                                                                | Males: 43.5±10.1<br>Females: 47.2±11.2                                               | White: 82<br>Non-white: 120                                              | Not reported                                       | Additional anticholinergic agents (n=79)                                                                                                                                                                                                                                          | Clozapine: 533±0.29<br>Laxative users: 486±30<br>Norclozapine: 337±0.19,<br>Non laxative users: 269±0.18 | >3 months         | Constipation as demonstrated by the use of laxatives              | No correlation with clozapine plasma levels. Positive correlation with norclozapine                                                                                                                       | 0 |

---

levels (laxative  
users had 29%  
higher levels of  
norclozapine  
compared to  
non users,  
p=0.046)

---

**Table S7.** Studies reporting hematological, genitourinary, and other adverse effects in relation to CLOZAPINE blood levels.

| Reference                   | Type of study                                       | Location | Patients (Males/Females) | Age (Mean) (Years)        | Race                                                                 | Diagnosis     | Comedication                                                                             | Averaged serum levels of clozapine (ng/ml)    | Duration                                | Reported side effects                                                                                                        | Correlation to clozapine plasma levels                                                  | Jadad score |
|-----------------------------|-----------------------------------------------------|----------|--------------------------|---------------------------|----------------------------------------------------------------------|---------------|------------------------------------------------------------------------------------------|-----------------------------------------------|-----------------------------------------|------------------------------------------------------------------------------------------------------------------------------|-----------------------------------------------------------------------------------------|-------------|
| <b>Hematological System</b> |                                                     |          |                          |                           |                                                                      |               |                                                                                          |                                               |                                         |                                                                                                                              |                                                                                         |             |
| [41]                        | Cross-sectional                                     | USA      | 44 (33/11)               | 35.6± 9.3 (range 17-54)   | Not specified                                                        | Schizophrenia | Not reported                                                                             | CLOZAPINE: 304±174<br>NCLOZAPINE:216±133      | 2.16± 0.35 years                        | WBC<br>Neutrophil Count                                                                                                      | No                                                                                      | 0           |
| [35]                        | Cross-sectional                                     | Denmark  | 30 (21/9)                | 37,6 ± 1,67               | Not specified                                                        | schizophrenia | Levomepromazine or chlorprothixene as sedatives in doses not exceeding 100 mg per day    | Median 430.4 (282.4-752.8)                    | At least 3 months (range: 1-17 years)   | Mild leukocytosis and increased erythrocyte folate                                                                           | No                                                                                      | 0           |
| [37]                        | Prospective longitudinal                            | Canada   | 37 (26/11)               | 35.2±10.2 (range: 18- 57) | Not specified                                                        | Schizophrenia | Lorazepam 2 mg daily was used sparingly as needed for agitation and aggressive behaviour | 379.5±156                                     | 4 to 8 weeks                            | Hematological parameters (WBC, red blood count, neutrophils, platelets, and lymphocytes counts or hemoglobin and hematocrit) | Weak, only with platelets count (small increase) between week 2 and 4 (p=0.042, r=0.32) | 0           |
| [40]                        | Prospective, double-blind (n=22), open-label (n=32) | USA      | 54 (34/20)               | 13.5±2.5 (range 7.0-19.1) | 25 white, 17 African-American, 4 Hispanic, 2 Asian 6 other           | schizophrenia | Mood stabilizers and antidepressants                                                     | CLOZAPINE:455±285.1<br>NCLOZAPINE:302.4±142.2 | 6 week treatment (2-6 years follow-up)  | Neutropenia (6%)                                                                                                             | No                                                                                      | 0           |
| [43]                        | Prospective, Open-label/double blind                | USA      | 6 (2/4)                  | 13.3 ± 2.7 (range 9-16)   | 2 Caucasians, 2 African-Americans, 1 Hispanic and 1 Pacific Islander | Schizophrenia | None                                                                                     | CLOZAPINE:289±116<br>NCLOZAPINE: 410±190      | 6 weeks                                 | Moderate neutropenia (one case)                                                                                              | No                                                                                      | 0           |
| [36]                        | Retrospective chart review                          | USA      | 58 (37/21)               | 36.4 ± 10.4               | 3 African-Americans, 55 white                                        | Schizophrenia | Not reported                                                                             | CLOZAPINE: 389±386<br>NCLOZAPINE:199±216      | Mean duration not reported; Samples for | WBC or granulocyte counts                                                                                                    | No                                                                                      | 0           |

|      |                              |         |                                                |                                              |              |                                  |                                                                                                                        |                                                                          |                                                                                             |                                                                                                                              |                                                                                                                                                                                                                                       |   |
|------|------------------------------|---------|------------------------------------------------|----------------------------------------------|--------------|----------------------------------|------------------------------------------------------------------------------------------------------------------------|--------------------------------------------------------------------------|---------------------------------------------------------------------------------------------|------------------------------------------------------------------------------------------------------------------------------|---------------------------------------------------------------------------------------------------------------------------------------------------------------------------------------------------------------------------------------|---|
|      |                              |         |                                                |                                              |              |                                  |                                                                                                                        |                                                                          | measuring drug levels drawn At least once during the first 3 months and then randomly after |                                                                                                                              |                                                                                                                                                                                                                                       |   |
| [78] | Retrospective, observational | Norway  | 129 (77/52)                                    | 34 (median) 20-84 (range)                    | Not reported | Not reported                     | Not reported                                                                                                           | CLOZAPINE: 1068 (26-3955)<br>NCLOZAPINE: 712 (31-5813)                   | not reported                                                                                | absolute neutrophil count (ANC)                                                                                              | Positive correlation between ANC and NCLOZAPINE levels (p=0.002) and NCLOZAPINE/CLOZAPINE ratio (p=0.04)                                                                                                                              | 0 |
| [77] | Cross-sectional, controlled  | Turkey  | 70 Patients: 38 (17/21)<br>Controls: 5 (14/18) | Patients: 40.94±10.1<br>Controls: 40.09±1.67 | Not reported | Schizophrenia or schizoaffective | Not reported                                                                                                           | 594.90±492.90<br>220.33±182.55                                           | At least 4 months                                                                           | Hematological parameters                                                                                                     | No correlation with RBC, MCV, MCH, MPV, WBC, LYM.<br>Negative correlation with PLT (r=-0.362, p=0.025), HGB (r=-0.342, p=0.025), NEU (r=-0.385, p=0.017)                                                                              | 0 |
| [38] | Prospective, open label      | Italy   | 16 (12/4)                                      | 34.62±7.56 (range: 25-48)                    | Not reported | schizophrenia                    | None                                                                                                                   | CLOZAPINE: 266.27±197.44 (25-1270)<br>NCLOZAPINE: 169.0±127.94 (25-1280) | 9 weeks                                                                                     | Leucocyte count<br>Neutrophil count                                                                                          | Positive correlation between CLOZAPINE and NCLOZAPINE levels and neutrophil count (r=0.26, p=0.001, r=0.20, p=0.01, respectively).<br>Negative correlation between NCLOZAPINE/CLOZAPINE ratio and neutrophil count (r=-0.26, p=0.002) | 0 |
| [69] | Prospective, open            | Austria | 68 (42/26)                                     | Males: 28.9±9.7<br>Females: 34.2±10.7        | Not reported | Not reported                     | Not reported. Stated that patients with and without hematologic abnormalities did not differ in terms of comedications | 145.8±160.1 (3.1-1571.0)                                                 | 16.7±24.7 weeks                                                                             | WBC disorders: Transient neutropenia (22%), eosinophilia (61.7%), and leukocytosis (40.9%).<br>Progressive neutropenia (n=2) | No                                                                                                                                                                                                                                    | 0 |

|                            |                                                     |        |                          |                                         |                                                            |               |                                                                                                                                                                                                                     |                                                           |                                                       |                                                                                                                                    |                                                                                                                                                                                                                                                       |   |
|----------------------------|-----------------------------------------------------|--------|--------------------------|-----------------------------------------|------------------------------------------------------------|---------------|---------------------------------------------------------------------------------------------------------------------------------------------------------------------------------------------------------------------|-----------------------------------------------------------|-------------------------------------------------------|------------------------------------------------------------------------------------------------------------------------------------|-------------------------------------------------------------------------------------------------------------------------------------------------------------------------------------------------------------------------------------------------------|---|
|                            |                                                     |        |                          |                                         |                                                            |               |                                                                                                                                                                                                                     |                                                           |                                                       |                                                                                                                                    | Chronic leukocytosis(n=1)                                                                                                                                                                                                                             |   |
| [67]                       | Cross-sectional                                     | Mexico | 41 (22/19)               | Males:34.68±1.58<br>Females: 31.58±1.29 | Not reported                                               | schizophrenia | Clonazepam: 30%, Fluoxetine: 22%, Paroxetine: 9%, Lithium: 7% Mirtazapine:6%, Metformin, Sulpiride, valproate, venlafaxine: 4% each, Duloxetine, escitalopram, imipramine, losartan, omeprazole, pregabalin:2% each | Males: 290.11±51.56<br>Females: 336.36±29.16              | Males: 10.05±1.74 months<br>Females: 6.63±1.15 months | Leukocyte count<br>Neutrophil count                                                                                                | Negative correlation between CLOZAPINE levels and neutrophil (standardized coefficient:- 0.631, p=0.004) and leukocyte count (standardized coefficient: - 0.725, p=0.001). No correlation between NCLOZAPINE levels and neutrophil or leukocyte count | 0 |
| Genitourinary Side Effects |                                                     |        |                          |                                         |                                                            |               |                                                                                                                                                                                                                     |                                                           |                                                       |                                                                                                                                    |                                                                                                                                                                                                                                                       |   |
| [62]                       | Prospective, double-blind                           | USA    | 39 (gender Not reported) | Not reported                            | Not reported                                               | Schizophrenia | Not reported                                                                                                                                                                                                        | CLOZAPINE: 325±199<br>NCLOZAPINE:576±326 (dose-dependent) | 16 weeks                                              | Urinary disturbances (tested in association with antimuscrinic activity, highly correlated with CLOZAPINElevel s, r=0.83, p<0.001) | No                                                                                                                                                                                                                                                    | 2 |
| [40]                       | Prospective, double-blind (n=22), open-label (n=32) | USA    | 54 (34/20)               | 13.5±2.5 (range 7.0-19.1)               | 25 white, 17 African American, 4 Hispanic, 2 Asian 6 other | schizophrenia | Mood stabilizers and antidepressants                                                                                                                                                                                | CLOZAPINE:455±285.1<br>NCLOZAPINE:302.4±142.2             | 6 week treatment (2-6 years follow-up)                | Enuresis (15%)                                                                                                                     | No                                                                                                                                                                                                                                                    | 0 |
| [43]                       | Prospective, Open-label/double blind                | USA    | 6 (2/4)                  | 13.3 ± 2.7 (range 9-16)                 | 2 Caucasians, 2 African-Americans, 1 Hispanic and 1        | Schizophrenia | None                                                                                                                                                                                                                | CLOZAPINE:289±116<br>NCLOZAPINE: 410±190                  | 6 weeks                                               | Enuresis(1/6)                                                                                                                      | No                                                                                                                                                                                                                                                    | 0 |

|       |                             |         |                                                      |                                                                        |                     |                                            |                                                                                      |                                                   |                                        |                                                                                                                                                                                                    |                                                                                                                                |   |
|-------|-----------------------------|---------|------------------------------------------------------|------------------------------------------------------------------------|---------------------|--------------------------------------------|--------------------------------------------------------------------------------------|---------------------------------------------------|----------------------------------------|----------------------------------------------------------------------------------------------------------------------------------------------------------------------------------------------------|--------------------------------------------------------------------------------------------------------------------------------|---|
|       |                             |         |                                                      |                                                                        | Pacific<br>Islander |                                            |                                                                                      |                                                   |                                        |                                                                                                                                                                                                    |                                                                                                                                |   |
| [41]  | Cross-sectional             | USA     | 44 (33/11)                                           | 35.6± 9.3 (range 17-54)                                                | Not specified       | Schizophrenia                              | Not reported                                                                         | CLOZAPINE: 304±174<br>NCLOZAPINE:216±133          | 2.16± 0.35 years                       | Nocturnal Enuresis (27%)                                                                                                                                                                           | No                                                                                                                             | 0 |
| [57]  | Prospective                 | Austria | Sample on clozapine: 100 (75/25) (Total sample:153 ) | 28.6±9.5                                                               | Not reported        | Schizophrenia<br>Schizophreniform disorder | Benzodiazepines, anticholinergic drugs, b-blockers, antidepressants, anticonvulsants |                                                   | 18 weeks                               | Sexual disturbances: Menorrhagia Amenorrhea Galactorrhea Dry Vagina Increased sexual desire Decreased sexual desire Orgasmic dysfunction Erectile dysfunction Ejaculatory dysfunction Gynecomastia | Positive in males, between clozapine plasma levels and diminished sexual desire (p=0.02) and functional disturbances (p=0.008) | 0 |
| Other |                             |         |                                                      |                                                                        |                     |                                            |                                                                                      |                                                   |                                        |                                                                                                                                                                                                    |                                                                                                                                |   |
| [55]  | Clinical study              | China   | 163 (47/116)                                         | Group I: 38.8 (23-58), group II: 41.5 (21-58), group III: 43.9 (22-60) | Chinese             | Schizophrenia                              | Not mentioned                                                                        | 221.4±109.6                                       | 38.3 ± 6.3 days (Clozapineapine group) | serum anticardiolipin antibodies (aCL) IgM, IgG                                                                                                                                                    | Positive correlation between CLOZAPINE levels and aCL IgM, (r=0.461, p=0.001) but no correlation with IgG                      | 1 |
| [77]  | Cross-sectional, controlled | Turkey  | 70 Patients: 38 (17/21) Controls: (14/18)            | Patients:40.94±10.15 Controls: 40.09±1.67                              | Not reported        | Schizophrenia or schizoaffective           | Not reported                                                                         | CLOZAPINE:594.90±4NCLOZAPINE: 92.90 220.33±182.55 | At least 4 months                      | B12, Na, K, ure, cre                                                                                                                                                                               | No correlation with URE, CRE, Na, K, B12.                                                                                      | 0 |

End of Supplemental data
